# Supplementary material for: Antioxidant Species in Grapes and Wines via Spectrophotometric Methods: No Quenching Effects by Copper(II) and Yeast Derivative Treatments
Source: Hindawi journal article supplement (doi:10.1155/2019/1354382), 2019-03-13
Supplement: f1 [file 1354382.f1.docx]

**Antioxidant species in grapes and wines via spectrophotometric methods:**

**no quenching effects by copper(II) and yeast derivatives treatments**

Gabriella TAMASI*1,2, Alessio PARDINI1,2, Claudia BONECHI1,2, Alessandro DONATI*1,2, Gemma LEONE1,3, Marco CONSUMI1,3, Daniele PAGNI4, Renzo CINI1, Claudio ROSSI1,2,5, Agnese MAGNANI1,3

*1Department of Biotechnology, Chemistry and Pharmacy, University of Siena, Via Aldo Moro 2, 53100 Siena, Italy. E-mails*[*gabriella.tamasi@unisi.it*](mailto:gabriella.tamasi@unisi.it)*;* [*alessandro.donati@unisi.it*](mailto:alessandro.donati@unisi.it)

*2Centre for Colloid and Surface Science (CSGI), University of Florence, Via della Lastruccia 3, 50019 Sesto Fiorentino, FI, Italy*

*3National Interuniversity Consortium of Materials Science and Technology (INSTM), Via G. Giusti 9, 50121 Firenze. Italy*

*4Rocca di Castagnoli, Località Castagnoli, 53013 Gaiole in Chianti, Siena, Italy*

*5Operative Unit, University of Siena, CampoVerde, Calabria, Italy*

**SUPPLEMENTARY MATERIAL**

**Table 1Sa**. Total nitrogen in selected samples (expressed as g/kg). Values of the three determinations for each replicate and three replicates.

| **Grape juice (JU)** |  |  |  | **Average** |
| --- | --- | --- | --- | --- |
|  | **#1’** | **#2’** | **#3’** |  |
|  | 0.198 | 0.212 | 0.220 | 0.210±0.011 |
|  | **#1''** | **#2''** | **#3''** |  |
|  | 0.224 | 0.233 | 0.248 | 0.235±0.012 |
|  | **#1'''** | **#2'''** | **#3'''** |  |
|  | 0.253 | 0.266 | 0.275 | 0.265±0.011 |
| **Total Average** |  |  |  | **0.240±0.028 gN/kg** |
| **Grape (SK+SE)** |  |  |  | **Average** |
|  | **#1’** | **#2’** | **#3’** |  |
|  | 5.750 | 6.090 | 6.340 | 6.060±0.300 |
|  | **#1''** | **#2''** | **#3''** |  |
|  | 6.350 | 6.950 | 7.250 | 6.850±0.458 |
|  | **#1'''** | **#2'''** | **#3'''** |  |
|  | 6.980 | 7.410 | 7.750 | 7.380±0.386 |
| **Total Average** |  |  |  | **6.763±0.664 gN/kg** |

**Table 1Sb**. Total protein content in selected samples computed as (total nitrogen x 6.36; expressed as g/kg, alanine equivalent). Values of the three determinations for each replicate and three replicates.

| **Grape juice (JU)** | **STY13-JU** |  |  | **Average** |
| --- | --- | --- | --- | --- |
|  | **#1’** | **#2’** | **#3’** |  |
|  | 1.259 | 1.348 | 1.399 | 1.336±0.070 |
|  | **#1''** | **#2''** | **#3''** |  |
|  | 1.425 | 1.482 | 1.577 | 1.495±0.076 |
|  | **#1'''** | **#2'''** | **#3'''** |  |
|  | 1.609 | 1.692 | 1.749 | 1.685±0.070 |
| **Total Average** |  |  |  | **1.526±0.178 gALA/kg** |
| **Grape (SK+SE)** |  |  |  | **Average** |
|  | **#1’** | **#2’** | **#3’** |  |
|  | 36.570 | 38.732 | 40.322 | 38.542±1.908 |
|  | **#1''** | **#2''** | **#3''** |  |
|  | 40.386 | 44.202 | 47.563 | 44.050±3.591 |
|  | **#1'''** | **#2'''** | **#3'''** |  |
|  | 44.393 | 47.128 | 49.290 | 46.937±2.455 |
| **Total Average** |  |  |  | **43.176±4.266 gALA/kg** |

**Table 1Sc**. Reducing sugar concentration in selected samples expressed as g/kg, glucose equivalent). Values of the three determinations for each replicate and three replicates.

| **Grape juice (JU)** | **STY13-JU** |  |  | **Average** |
| --- | --- | --- | --- | --- |
|  | **#1’** | **#2’** | **#3’** |  |
|  | 206.0 | 215.8 | 223.3 | 215.0±8.7 |
|  | **#1''** | **#2''** | **#3''** |  |
|  | 228.8 | 221.9 | 231.8 | 227.5±5.1 |
|  | **#1'''** | **#2'''** | **#3'''** |  |
|  | 228.9 | 235.2 | 242.5 | 235.5±6.9 |
| **Total Average** |  |  |  | **226.0±10.3gGLU/kg** |

**Table 1Sd**. Total sugar values in selected samples (expressed as °Brix). Values of the three determinations for each replicate and three replicates.

| **Grape juice (JU)** | **STY13-JU** |  |  | **Average** |
| --- | --- | --- | --- | --- |
|  | **#1’** | **#2’** | **#3’** |  |
|  | 21.5 | 20.3 | 22.1 | 21.3±0.9 |
|  | **#1''** | **#2''** | **#3''** |  |
|  | 20.8 | 19.9 | 19.5 | 20.1±0.7 |
|  | **#1'''** | **#2'''** | **#3'''** |  |
|  | 22.1 | 23.0 | 21.5 | 22.2±0.8 |
| **Total Average** |  |  |  | **21.2±1.0 °Brix** |
| **STY13-MU** |  |  |  | **Average** |
|  | **#1’** | **#2’** | **#3’** |  |
|  | 22.7 | 21.4 | 23.4 | 22.5±1.0 |
|  | **#1''** | **#2''** | **#3''** |  |
|  | 20.6 | 21.4 | 21.9 | 21.3±0.7 |
|  | **#1'''** | **#2'''** | **#3'''** |  |
|  | 24.1 | 23.0 | 22.5 | 23.2±0.8 |
| **Total Average** |  |  |  | **22.5±1.0 °Brix** |

**Table 2Sa**. pH values in selected samples. Values of the three determinations for each replicate and three replicates.

| **Grape juice (JU)** | | **STY13-JU** | |  | |  | | **Average** |
| --- | --- | --- | --- | --- | --- | --- | --- | --- |
|  | | **#1’** | | **#2’** | | **#3’** | |  |
|  | | 3.113 | | 3.123 | | 3.108 | | 3.115±0.008 |
|  | | **#1''** | | **#2''** | | **#3''** | |  |
|  | | 3.125 | | 3.131 | | 3.134 | | 3.130±0.005 |
|  | | **#1'''** | | **#2'''** | | **#3'''** | |  |
|  | | 3.146 | | 3.140 | | 3.150 | | 3.145±0.005 |
| **Total Average** | |  | |  | |  | | **3.13±0.02** |
| **STY13-MU** | |  | |  | |  | | **Average** |
|  | | **#1’** | | **#2’** | | **#3’** | |  |
|  | | 3.195 | | 3.210 | | 3.225 | | 3.210±0.015 |
|  | | **#1''** | | **#2''** | | **#3''** | |  |
|  | | 3.150 | | 3.156 | | 3.168 | | 3.158±0.010 |
|  | | **#1'''** | | **#2'''** | | **#3'''** | |  |
|  | | 3.187 | | 3.172 | | 3.166 | | 3.175±0.011 |
| **Total Average** | |  | |  | |  | | **3.18±0.03** |
| **STY13-AF/NOV** | |  | |  | |  | | **Average** |
|  | | **#1’** | | **#2’** | | **#3’** | |  |
|  | | 3.280 | | 3.278 | | 3.298 | | 3.285±0.011 |
|  | | **#1''** | | **#2''** | | **#3''** | |  |
|  | | 3.266 | | 3.258 | | 3.272 | | 3.265±0.07 |
|  | | **#1'''** | | **#2'''** | | **#3'''** | |  |
|  | | 3.300 | | 3.313 | | 3.323 | | 3.312±0.012 |
| **Total Average** | |  | |  | |  | | **3.29±0.02** |
| **STY13-MF** | |  | |  | |  | | **Average** |
|  | | **#1’** | | **#2’** | | **#3’** | |  |
|  | | 3.403 | | 3.395 | | 3.418 | | 3.405±0.012 |
|  | | **#1''** | | **#2''** | | **#3''** | |  |
|  | | 3.433 | | 3.420 | | 3.410 | | 3.421±0.012 |
|  | | **#1'''** | | **#2'''** | | **#3'''** | |  |
|  | | 3.442 | | 3.434 | | 3.455 | | 3.444±0.011 |
| **Total Average** | |  | |  | |  | | **3.42±0.02** |
|  | |  | |  | |  | |  |
| **SGTY13-AF/NOV** | |  | |  | |  | | **Average** |
|  | | **#1’** | | **#2’** | | **#3’** | |  |
|  | | 3.16 | | 3.18 | | 3.19 | | 3.18±0.01 |
|  | | **#1''** | | **#2''** | | **#3''** | |  |
|  | | 3.20 | | 3.20 | | 3.21 | | 3.20±0.01 |
|  | | **#1'''** | | **#2'''** | | **#3'''** | |  |
|  | | 3.21 | | 3.22 | | 3.23 | | 3.22±0.01 |
| **Total Average** | |  | |  | |  | | **3.20±0.02** |
| **SGTY13-MF** | |  | |  | |  | | **Average** |
|  | | **#1’** | | **#2’** | | **#3’** | |  |
|  | | 3.19 | | 3.20 | | 3.21 | | 3.20±0.01 |
|  | | **#1''** | | **#2''** | | **#3''** | |  |
|  | | 3.22 | | 3.21 | | 3.23 | | 3.22±0.01 |
|  | | **#1'''** | | **#2'''** | | **#3'''** | |  |
|  | | 3.23 | | 3.24 | | 3.25 | | 3.24±0.01 |
| **Total Average** | |  | |  | |  | | **3.22±0.02** |
| **STY15** |  | |  | |  | | **Average** | |
|  | **#1’** | | **#2’** | | **#3’** | |  | |
|  | 3.38 | | 3.41 | | 3.42 | | 3.40±0.02 | |
|  | **#1''** | | **#2''** | | **#3''** | |  | |
|  | 3.40 | | 3.41 | | 3.45 | | 3.42±0.03 | |
|  | **#1'''** | | **#2'''** | | **#3'''** | |  | |
|  | 3.46 | | 3.43 | | 3.48 | | 3.46±0.03 | |
| **Total Average** |  | |  | |  | | **3.43±0.03** | |
| **SCCY15** |  | |  | |  | | **Average** | |
|  | **#1’** | | **#2’** | | **#3’** | |  | |
|  | 3.38 | | 3.40 | | 3.42 | | 3.40±0.02 | |
|  | **#1''** | | **#2''** | | **#3''** | |  | |
|  | 3.37 | | 3.39 | | 3.33 | | 3.36±0.03 | |
|  | **#1'''** | | **#2'''** | | **#3'''** | |  | |
|  | 3.39 | | 3.42 | | 3.43 | | 3.41±0.02 | |
| **Total Average** |  | |  | |  | | **3.39±0.03** | |

**Table 2Sb**. Total acidity content in selected samples (expressed as g/L, tartaric acid equivalent). Values of the three determinations for each replicate and three replicates.

| **STY13-JU** |  |  |  | **Average** |
| --- | --- | --- | --- | --- |
|  | **#1’** | **#2’** | **#3’** |  |
|  | 6.12 | 6.40 | 5.92 | 6.15±0.24 |
|  | **#1''** | **#2''** | **#3''** |  |
|  | 6.32 | 6.66 | 6.89 | 6.62±0.29 |
|  | **#1'''** | **#2'''** | **#3'''** |  |
|  | 7.00 | 7.17 | 7.32 | 6.86±0.16 |
| **Total Average** |  |  |  | **6.54±0.36gTAA/L** |
| **STY13-MU** |  |  |  | **Average** |
|  | **#1’** | **#2’** | **#3’** | 6.02±0.19 |
|  | 5.84 | 6.01 | 6.22 |  |
|  | **#1''** | **#2''** | **#3''** | 6.52±0.23 |
|  | 6.60 | 6.26 | 6.69 |  |
|  | **#1'''** | **#2'''** | **#3'''** | 6.80±0.18 |
|  | 6.63 | 6.79 | 6.99 |  |
| **Total Average** |  |  |  | **6.45±0.40gTAA/L** |
| **STY13-AF/NOV** |  |  |  | **Average** |
|  | **#1’** | **#2’** | **#3’** |  |
|  | 6.50 | 6.66 | 6.78 | 6.65±0.14 |
|  | **#1''** | **#2''** | **#3''** |  |
|  | 6.99 | 6.47 | 7.14 | 6.87±0.35 |
|  | **#1'''** | **#2'''** | **#3'''** |  |
|  | 7.20 | 7.06 | 7.58 | 7.28±0.27 |
| **Total Average** |  |  |  | **6.93±0.32gTAA/L** |
| **STY13-MF** |  |  |  | **Average** |
|  | **#1’** | **#2’** | **#3’** |  |
|  | 5.57 | 5.70 | 5.69 | 5.65±0.07 |
|  | **#1''** | **#2''** | **#3''** |  |
|  | 5.55 | 5.60 | 5.63 | 5.59±0.04 |
|  | **#1'''** | **#2'''** | **#3'''** |  |
|  | 5.78 | 5.81 | 5.86 | 5.82±0.04 |
| **Total Average** |  |  |  | **5.69±0.12gTAA/L** |
|  |  |  |  |  |
| **SGTY13-AF** |  |  |  | **Average** |
|  | **#1’** | **#2’** | **#3’** |  |
|  | 6.34 | 6.40 | 6.44 | 6.39±0.05 |
|  | **#1''** | **#2''** | **#3''** |  |
|  | 6.4 | 6.50 | 6.55 | 6.51±0.04 |
|  | **#1'''** | **#2'''** | **#3'''** |  |
|  | 6.63 | 6.68 | 6.72 | 6.68±0.05 |
| **Total Average** |  |  |  | **6.53±0.15 gTAA/L** |
| **SGTY13-MF** |  |  |  | **Average** |
|  | **#1’** | **#2’** | **#3’** |  |
|  | 6.11 | 6.18 | 6.27 | 6.19±0.08 |
|  | **#1''** | **#2''** | **#3''** |  |
|  | 6.28 | 6.35 | 6.39 | 6.34±0.06 |
|  | **#1'''** | **#2'''** | **#3'''** |  |
|  | 6.45 | 6.52 | 6.57 | 6.51±0.06 |
| **Total Average** |  |  |  | **6.35±0.16 gTAA/L** |
| **STY15** |  |  |  | **Average** |
|  | **#1’** | **#2’** | **#3’** |  |
|  | 5.39 | 5.67 | 5.88 | 5.65±0.25 |
|  | **#1''** | **#2''** | **#3''** |  |
|  | 5.74 | 5.75 | 5.77 | 5.75±0.02 |
|  | **#1'''** | **#2'''** | **#3'''** |  |
|  | 6.31 | 6.27 | 6.20 | 6.26±0.06 |
| **Total Average** |  |  |  | **5.89±0.33gTAA/L** |
| **SCCY15** |  |  |  | **Average** |
|  | **#1’** | **#2’** | **#3’** |  |
|  | 5.65 | 5.82 | 5.94 | 5.803±0.15 |
|  | **#1''** | **#2''** | **#3''** |  |
|  | 5.62 | 5.76 | 5.87 | 5.75±0.13 |
|  | **#1'''** | **#2'''** | **#3'''** |  |
|  | 6.04 | 6.14 | 6.26 | 6.15±0.11 |
| **Total Average** |  |  |  | **5.90±0.22 gTAA/L** |

**Table 2Sc**. Volatile acidity content in selected samples(expressed as g/L, acetic acid equivalent). Values of the three determinations for each replicate and three replicates.

| **STY13-JU** |  |  |  | **Average** |
| --- | --- | --- | --- | --- |
|  | **#1’** | **#2’** | **#3’** |  |
|  | 254 | 265 | 269 | 263±8 |
|  | **#1''** | **#2''** | **#3''** |  |
|  | 271 | 282 | 292 | 281±10 |
|  | **#1'''** | **#2'''** | **#3'''** |  |
|  | 284 | 291 | 302 | 292±9 |
| **Total Average** |  |  |  | **279±15 gACA/L** |
| **STY13-MU** |  |  |  | **Average** |
|  | **#1’** | **#2’** | **#3’** |  |
|  | 249 | 256 | 269 | 258±10 |
|  | **#1''** | **#2''** | **#3''** |  |
|  | 268 | 272 | 279 | 273±5 |
|  | **#1'''** | **#2'''** | **#3'''** |  |
|  | 280 | 289 | 296 | 289±8 |
| **Total Average** |  |  |  | **273±15 gACA/L** |
| **STY13-AF/NOV** |  |  |  | **Average** |
|  | **#1’** | **#2’** | **#3’** |  |
|  | 274 | 285 | 293 | 284±10 |
|  | **#1''** | **#2''** | **#3''** |  |
|  | 294 | 306 | 315 | 305±10 |
|  | **#1'''** | **#2'''** | **#3'''** |  |
|  | 315 | 322 | 332 | 323±9 |
| **Total Average** |  |  |  | **304±20 gACA/L** |
| **STY13-MF** |  |  |  | **Average** |
|  | **#1’** | **#2’** | **#3’** |  |
|  | 411 | 420 | 427 | 419±8 |
|  | **#1''** | **#2''** | **#3''** |  |
|  | 441 | 450 | 465 | 452±12 |
|  | **#1'''** | **#2'''** | **#3'''** |  |
|  | 468 | 481 | 488 | 479±10 |
| **Total Average** |  |  |  | **450±30 gACA/L** |
|  |  |  |  |  |
| **SGTY13-AF** |  |  |  | **Average** |
|  | **#1’** | **#2’** | **#3’** |  |
|  | 291 | 307 | 330 | 309±20 |
|  | **#1''** | **#2''** | **#3''** |  |
|  | 325 | 350 | 365 | 347±20 |
|  | **#1'''** | **#2'''** | **#3'''** |  |
|  | 376 | 395 | 403 | 391±14 |
| **Total Average** |  |  |  | **349±41 gACA/L** |
| **SGTY13-MF** |  |  |  | **Average** |
|  | **#1’** | **#2’** | **#3’** |  |
|  | 322 | 341 | 354 | 339±16 |
|  | **#1''** | **#2''** | **#3''** |  |
|  | 360 | 383 | 405 | 383±23 |
|  | **#1'''** | **#2'''** | **#3'''** |  |
|  | 402 | 421 | 435 | 419±17 |
| **Total Average** |  |  |  | **380±40 gACA/L** |
| **STY15** |  |  |  | **Average** |
|  | **#1’** | **#2’** | **#3’** |  |
|  | 390 | 404 | 424 | 406±17 |
|  | **#1''** | **#2''** | **#3''** |  |
|  | 440 | 452 | 460 | 451±10 |
|  | **#1'''** | **#2'''** | **#3'''** |  |
|  | 452 | 463 | 475 | 463±11 |
| **Total Average** |  |  |  | **380±40 gACA/L** |
| **SCCY15** |  |  |  | **Average** |
|  | **#1’** | **#2’** | **#3’** |  |
|  | 426 | 441 | 454 | 440±14 |
|  | **#1''** | **#2''** | **#3''** |  |
|  | 458 | 472 | 483 | 471±12 |
|  | **#1'''** | **#2'''** | **#3'''** |  |
|  | 484 | 500 | 517 | 500±16 |
| **Total Average** |  |  |  | **470±30 gACA/L** |

**Table 2Sd**. Total sulfur dioxide in selected samples (expressed as mgSO2/L). Values of the three determinations for each replicate and three replicates.

| **STY13-JU** |  |  |  | **Average** |
| --- | --- | --- | --- | --- |
|  | **#1’** | **#2’** | **#3’** |  |
|  | 20.0 | 20.7 | 21.1 | 20.6±0.6 |
|  | **#1''** | **#2''** | **#3''** |  |
|  | 21.3 | 21.5 | 22.4 | 21.7±0.6 |
|  | **#1'''** | **#2'''** | **#3'''** |  |
|  | 23.0 | 23.6 | 23.9 | 23.5±0.5 |
| **Total Average** |  |  |  | **21.9±1.5 mgSO2/L** |
| **STY13-MU** |  |  |  | **Average** |
|  | **#1’** | **#2’** | **#3’** |  |
|  | 19.9 | 20.7 | 20.8 | 20.4±0.5 |
|  | **#1''** | **#2''** | **#3''** |  |
|  | 21.2 | 21.8 | 21.9 | 21.6±0.4 |
|  | **#1'''** | **#2'''** | **#3'''** |  |
|  | 22.9 | 23.4 | 23.7 | 23.3±0.4 |
| **Total Average** |  |  |  | **21.8±1.5 mgSO2/L** |
| **STY13-AF/NOV** |  |  |  | **Average** |
|  | **#1’** | **#2’** | **#3’** |  |
|  | 56.0 | 56.9 | 57.5 | 56.8±0.8 |
|  | **#1''** | **#2''** | **#3''** |  |
|  | 61.3 | 62.1 | 62.6 | 62.0±0.7 |
|  | **#1'''** | **#2'''** | **#3'''** |  |
|  | 63.4 | 62.5 | 63.6 | 63.2±0.6 |
| **Total Average** |  |  |  | **60.7±3.4 mgSO2/L** |
| **STY13-MF** |  |  |  | **Average** |
|  | **#1’** | **#2’** | **#3’** |  |
|  | 39.4 | 40.2 | 38.9 | 39.5±0.07 |
|  | **#1''** | **#2''** | **#3''** |  |
|  | 40.2 | 41.6 | 40.8 | 40.9±0.07 |
|  | **#1'''** | **#2'''** | **#3'''** |  |
|  | 42.7 | 43.4 | 41.8 | 42.6±0.08 |
| **Total Average** |  |  |  | **41.0±1.6mgSO2/L** |
| **SGTY13-AF** |  |  |  | **Average** |
|  | **#1’** | **#2’** | **#3’** |  |
|  | 40.6 | 41.2 | 41.6 | 41.1±0.5 |
|  | **#1''** | **#2''** | **#3''** |  |
|  | 41.6 | 42.3 | 42.7 | 42.2±0.6 |
|  | **#1'''** | **#2'''** | **#3'''** |  |
|  | 43.2 | 43.8 | 42.4 | 43.1±0.7 |
| **Total Average** |  |  |  | **42.1±1.0mgSO2/L** |
| **SGTY13-MF** |  |  |  | **Average** |
|  | **#1’** | **#2’** | **#3’** |  |
|  | 39.0 | 38.5 | 39.7 | 39.1±0.6 |
|  | **#1''** | **#2''** | **#3''** |  |
|  | 37.1 | 37.9 | 38.5 | 37.8±0.7 |
|  | **#1'''** | **#2'''** | **#3'''** |  |
|  | 40.3 | 39.5 | 40.7 | 40.2±0.6 |
| **Total Average** |  |  |  | **39.0±1.2mgSO2/L** |
| **STY15** |  |  |  | **Average** |
|  | **#1’** | **#2’** | **#3’** |  |
|  | 61.3 | 63.0 | 64.2 | 62.8±1.5 |
|  | **#1''** | **#2''** | **#3''** |  |
|  | 64.7 | 66.0 | 67.1 | 65.9±1.2 |
|  | **#1'''** | **#2'''** | **#3'''** |  |
|  | 68.4 | 69.1 | 70.4 | 69.3±1.0 |
| **Total Average** |  |  |  | **66.0±3.3mgSO2/L** |
| **SCCY15** |  |  |  | **Average** |
|  | **#1’** | **#2’** | **#3’** |  |
|  | 56.5 | 59.0 | 61.8 | 56.5±2.7 |
|  | **#1''** | **#2''** | **#3''** |  |
|  | 66.3 | 64.5 | 68.8 | 66.5±2.2 |
|  | **#1'''** | **#2'''** | **#3'''** |  |
|  | 74.6 | 73.4 | 71.7 | 73.2±1.5 |
| **Total Average** |  |  |  | **66.3±7.1mgSO2/L** |

**Table 2Se**. Volatile sulfur dioxide in selected samples(expressed as mgSO2/L). Values of the three determinations for each replicate and three replicates.

| **STY13-JU** |  |  |  | **Average** |
| --- | --- | --- | --- | --- |
|  | **#1’** | **#2’** | **#3’** |  |
|  | 10.8 | 11.2 | 10.9 | 11.0±0.2 |
|  | **#1''** | **#2''** | **#3''** |  |
|  | 9.9 | 10.3 | 10.6 | 10.3±0.3 |
|  | **#1'''** | **#2'''** | **#3'''** |  |
|  | 11.2 | 10.9 | 11.5 | 11.2±0.3 |
| **Total Average** |  |  |  | **10.8±0.5mgSO2/L** |
| **STY13-MU** |  |  |  | **Average** |
|  | **#1’** | **#2’** | **#3’** |  |
|  | 10.7 | 11.3 | 11.0 | 11.0±0.3 |
|  | **#1''** | **#2''** | **#3''** |  |
|  | 9.9 | 10.1 | 10.5 | 10.2±0.3 |
|  | **#1'''** | **#2'''** | **#3'''** |  |
|  | 10.8 | 11.0 | 11.1 | 12.0±0.2 |
| **Total Average** |  |  |  | **10.7±0.5mgSO2/L** |
| **STY13-AF/NOV** |  |  |  | **Average** |
|  | **#1’** | **#2’** | **#3’** |  |
|  | 40.9 | 41.5 | 42.7 | 41.7±0.9 |
|  | **#1''** | **#2''** | **#3''** |  |
|  | 43.8 | 42.5 | 44.3 | 43.5±0.9 |
|  | **#1'''** | **#2'''** | **#3'''** |  |
|  | 45.5 | 46.2 | 48.1 | 46.2±1.3 |
| **Total Average** |  |  |  | **44.0±2.5mgSO2/L** |
| **STY13-MF** |  |  |  | **Average** |
|  | **#1’** | **#2’** | **#3’** |  |
|  | 28.9 | 29.4 | 30.2 | 29.5±0.7 |
|  | **#1''** | **#2''** | **#3''** |  |
|  | 30.2 | 30.7 | 31.6 | 30.8±0.7 |
|  | **#1'''** | **#2'''** | **#3'''** |  |
|  | 32.6 | 32.0 | 33.4 | 32.7±0.7 |
| **Total Average** |  |  |  | **31.0±1.6mgSO2/L** |
| **SGTY13-AF** |  |  |  | **Average** |
|  | **#1’** | **#2’** | **#3’** |  |
|  | 29.5 | 30.0 | 30.3 | 29.9±0.4 |
|  | **#1''** | **#2''** | **#3''** |  |
|  | 30.8 | 31.3 | 31.5 | 31.2±0.4 |
|  | **#1'''** | **#2'''** | **#3'''** |  |
|  | 31.6 | 32.0 | 32.1 | 31.9±0.3 |
| **Total Average** |  |  |  | **31.0±1.0 mgSO2/L** |
| **SGTY13-MF** |  |  |  | **Average** |
|  | **#1’** | **#2’** | **#3’** |  |
|  | 25.5 | 26.0 | 26.7 | 26.1±0.6 |
|  | **#1''** | **#2''** | **#3''** |  |
|  | 26.5 | 27.0 | 27.3 | 26.9±0.4 |
|  | **#1'''** | **#2'''** | **#3'''** |  |
|  | 27.5 | 27.9 | 28.6 | 28.0±0.6 |
| **Total Average** |  |  |  | **27.0±1.0 mgSO2/L** |
| **STY15** |  |  |  | **Average** |
|  | **#1’** | **#2’** | **#3’** |  |
|  | 10.4 | 11.2 | 11.8 | 11.1±0.7 |
|  | **#1''** | **#2''** | **#3''** |  |
|  | 11.2 | 11.9 | 12.3 | 11.8±0.6 |
|  | **#1'''** | **#2'''** | **#3'''** |  |
|  | 13.2 | 12.5 | 13.7 | 13.1±0.6 |
| **Total Average** |  |  |  | **12.0±1.0 mgSO2/L** |
| **SCCY15** |  |  |  | **Average** |
|  | **#1’** | **#2’** | **#3’** |  |
|  | 10.6 | 12.3 | 13.4 | 12.1±1.4 |
|  | **#1''** | **#2''** | **#3''** |  |
|  | 12.6 | 13.5 | 14.2 | 13.4±0.8 |
|  | **#1'''** | **#2'''** | **#3'''** |  |
|  | 15.9 | 17.6 | 15.6 | 16.4±1.0 |
| **Total Average** |  |  |  | **14.0±2.2 mgSO2/L** |

**Table 2Sf**. Alcohol content percentage in selected samples. Values of the three determinations for each replicate and three replicates.

| **STY13-AF/NOV** |  |  |  | **Average** |
| --- | --- | --- | --- | --- |
|  | **#1’** | **#2’** | **#3’** |  |
|  | 13.6 | 13.7 | 13.7 | 13.7±0.1 |
|  | **#1''** | **#2''** | **#3''** |  |
|  | 13.9 | 14.0 | 13.9 | 13.9±0.1 |
|  | **#1'''** | **#2'''** | **#3'''** |  |
|  | 14.0 | 14.1 | 14.2 | 14.1±0.1 |
| **Total Average** |  |  |  | **13.9±0.2 %** |
| **STY13-MF** |  |  |  | **Average** |
|  | **#1’** | **#2’** | **#3’** |  |
|  | 13.7 | 13.9 | 14.0 | 13.9±0.1 |
|  | **#1''** | **#2''** | **#3''** |  |
|  | 13.8 | 14.1 | 14.2 | 14.1±0.2 |
|  | **#1'''** | **#2'''** | **#3'''** |  |
|  | 13.9 | 14.4 | 14.5 | 13.9±0.3 |
| **Total Average** |  |  |  | **14.1±0.2 %** |
| **SGTY13-AF** |  |  |  | **Average** |
|  | **#1’** | **#2’** | **#3’** |  |
|  | 13.3 | 13.4 | 13.6 | 13.4±0.2 |
|  | **#1''** | **#2''** | **#3''** |  |
|  | 13.5 | 13.6 | 13.9 | 13.7±0.2 |
|  | **#1'''** | **#2'''** | **#3'''** |  |
|  | 13.5 | 13.7 | 13.8 | 13.7±0.2 |
| **Total Average** |  |  |  | **13.6±0.1 %** |
| **SGTY13-MF** |  |  |  | **Average** |
|  | **#1’** | **#2’** | **#3’** |  |
|  | 14.3 | 14.5 | 14.5 | 14.3±0.1 |
|  | **#1''** | **#2''** | **#3''** |  |
|  | 14.3 | 14.5 | 14.5 | 14.3±0.2 |
|  | **#1'''** | **#2'''** | **#3'''** |  |
|  | 14.5 | 14.8 | 14.9 | 14.7±0.2 |
| **Total Average** |  |  |  | **14.5±0.1 %** |
|  |  |  |  |  |
| **STY15** |  |  |  | **Average** |
|  | **#1’** | **#2’** | **#3’** |  |
|  | 14.3 | 14.2 | 14.4 | 14.3±0.1 |
|  | **#1''** | **#2''** | **#3''** |  |
|  | 14.3 | 14.4 | 14.5 | 14.4±0.1 |
|  | **#1'''** | **#2'''** | **#3'''** |  |
|  | 14.5 | 14.5 | 14.7 | 14.5±0.1 |
| **Total Average** |  |  |  | **14.4±0.1 %** |
| **SCCY15** |  |  |  | **Average** |
|  | **#1’** | **#2’** | **#3’** |  |
|  | 14.2 | 14.3 | 14.3 | 14.3±0.1 |
|  | **#1''** | **#2''** | **#3''** |  |
|  | 14.4 | 14.3 | 14.5 | 14.4±0.1 |
|  | **#1'''** | **#2'''** | **#3'''** |  |
|  | 14.5 | 14.6 | 14.7 | 14.5±0.1 |
| **Total Average** |  |  |  | **14.4±0.1 %** |

**Table 3Sa**.Total polyphenol content in selected samples (expressed as mg/L, gallic acid equivalent). Values of the three determinations for each replicate and three replicates.

| **STY13-JU** |  |  |  | **Average** |
| --- | --- | --- | --- | --- |
|  | **#1’** | **#2’** | **#3’** |  |
|  | 404 | 408 | 416 | 409±6 |
|  | **#1''** | **#2''** | **#3''** |  |
|  | 423 | 417 | 426 | 422±5 |
|  | **#1'''** | **#2'''** | **#3'''** |  |
|  | 435 | 430 | 423 | 429±6 |
| **Total Average** |  |  |  | **420±10 mgGAA/L** |
| **STY13-MU** |  |  |  | **Average** |
|  | **#1’** | **#2’** | **#3’** |  |
|  | 437 | 451 | 456 | 448±10 |
|  | **#1''** | **#2''** | **#3''** |  |
|  | 471 | 465 | 482 | 473±9 |
|  | **#1'''** | **#2'''** | **#3'''** |  |
|  | 459 | 461 | 477 | 466±10 |
| **Total Average** |  |  |  | **462±13 mgGAA/L** |
| **STY13-AF/NOV** |  |  |  | **Average** |
|  | **#1’** | **#2’** | **#3’** |  |
|  | 2899 | 2940 | 2969 | 2936±35 |
|  | **#1''** | **#2''** | **#3''** |  |
|  | 3048 | 3010 | 3092 | 3050±41 |
|  | **#1'''** | **#2'''** | **#3'''** |  |
|  | 3074 | 3110 | 3155 | 3113±41 |
| **Total Average** |  |  |  | **3033±90 mgGAA/L** |
| **STY13-MF** |  |  |  | **Average** |
|  | **#1’** | **#2’** | **#3’** |  |
|  | 2927 | 2950 | 2985 | 2954±29 |
|  | **#1''** | **#2''** | **#3''** |  |
|  | 3012 | 3040 | 3074 | 3042±31 |
|  | **#1'''** | **#2'''** | **#3'''** |  |
|  | 2948 | 2917 | 2985 | 2950±34 |
| **Total Average** |  |  |  | **2982±52 mgGAA/L** |
|  |  |  |  |  |
| **SGTY13-AF** |  |  |  | **Average** |
|  | **#1’** | **#2’** | **#3’** |  |
|  | 2535 | 2556 | 2583 | 2558±24 |
|  | **#1''** | **#2''** | **#3''** |  |
|  | 2600 | 2581 | 2625 | 2602±22 |
|  | **#1'''** | **#2'''** | **#3'''** |  |
|  | 2640 | 2646 | 2607 | 2631±21 |
| **Total Average** |  |  |  | **2597±37 mgGAA/L** |
| **SGTY13-MF** |  |  |  | **Average** |
|  | **#1’** | **#2’** | **#3’** |  |
|  | 2415 | 2440 | 2471 | 2442±28 |
|  | **#1''** | **#2''** | **#3''** |  |
|  | 2379 | 2401 | 2330 | 2370±36 |
|  | **#1'''** | **#2'''** | **#3'''** |  |
|  | 2485 | 2508 | 2537 | 2510±26 |
| **Total Average** |  |  |  | **2441±70mgGAA/L** |
| **STY15** |  |  |  | **Average** |
|  | **#1’** | **#2’** | **#3’** |  |
|  | 3259 | 3275 | 3288 | 3274±15 |
|  | **#1''** | **#2''** | **#3''** |  |
|  | 3337 | 3320 | 3351 | 3336±16 |
|  | **#1'''** | **#2'''** | **#3'''** |  |
|  | 3380 | 3392 | 3407 | 3393±14 |
| **Total Average** |  |  |  | **3334±60 mgGAA/L** |
| **SCCY15** |  |  |  | **Average** |
|  | **#1’** | **#2’** | **#3’** |  |
|  | 2655 | 2676 | 2740 | 2690±44 |
|  | **#1''** | **#2''** | **#3''** |  |
|  | 2755 | 2810 | 2834 | 2790±41 |
|  | **#1'''** | **#2'''** | **#3'''** |  |
|  | 2855 | 2890 | 2905 | 2883±26 |
| **Total Average** |  |  |  | **2788±97 mgGAA/L** |

**Table 3Sb**.Total anthocyanin content in selected samples (expressed as mg/L, malvidine glucoside equivalent). Values of the three determinations for each replicate and three replicates.

| **STY15** |  |  |  | **Average** |
| --- | --- | --- | --- | --- |
|  | **#1’** | **#2’** | **#3’** |  |
|  | 190.5 | 186.0 | 193.6 | 190.0±3.8 |
|  | **#1''** | **#2''** | **#3''** |  |
|  | 201.2 | 197.8 | 195.1 | 198.0±3.1 |
|  | **#1'''** | **#2'''** | **#3'''** |  |
|  | 200.7 | 203.2 | 205.2 | 203.0±2.3 |
| **Total Average** |  |  |  | **197±7 mgMVG/L** |
| **SCCY15** |  |  |  | **Average** |
|  | **#1’** | **#2’** | **#3’** |  |
|  | 225.1 | 231.9 | 236.4 | 231.1±5.7 |
|  | **#1''** | **#2''** | **#3''** |  |
|  | 241.4 | 235.5 | 243.8 | 240.2±4.3 |
|  | **#1'''** | **#2'''** | **#3'''** |  |
|  | 247.2 | 252.2 | 256.0 | 251.8±4.4 |
| **Total Average** |  |  |  | **241±10mgMVG/L** |

**Table 3Sc**. *trans*-resveratrol content in selected samples (expressed as mg/L or mg/kg). Values of the three determinations for each replicate and three/four replicates.

| **STY13-SK&SE** |  |  |  | **Average** |
| --- | --- | --- | --- | --- |
|  | **#1’** | **#2’** | **#3’** |  |
|  | 4.980 | 5.150 | 5.410 | 5.180±0.316 |
|  | **#1''** | **#2''** | **#3''** |  |
|  | 4.780 | 5.250 | 5.120 | 5.050±0.243 |
|  | **#1'''** | **#2'''** | **#3'''** |  |
|  | 5.820 | 5.660 | 5.470 | 5.650±0.175 |
| **Total Average** |  |  |  | **5.293±0.316 mg/kg** |
| **STY13-SE** |  |  |  | **Average** |
|  | **#1’** | **#2’** | **#3’** |  |
|  | 0.302 | 0.310 | 0.316 | 0.309±0.007 |
|  | **#1''** | **#2''** | **#3''** |  |
|  | 0.322 | 0.314 | 0.327 | 0.321±0.007 |
|  | **#1'''** | **#2'''** | **#3'''** |  |
|  | 0.324 | 0.336 | 0.329 | 0.330±0.006 |
| **Total Average** |  |  |  | **0.320±0.011 mg/kg** |
| **STY13-SK** |  |  |  | **Average** |
|  | **#1’** | **#2’** | **#3’** |  |
|  | 10.270 | 10.390 | 10.450 | 10.370±0.092 |
|  | **#1''** | **#2''** | **#3''** |  |
|  | 10.490 | 10.400 | 10.560 | 10.483±0.080 |
|  | **#1'''** | **#2'''** | **#3'''** |  |
|  | 10.570 | 10.650 | 10.730 | 10.650±0.080 |
| **Total Average** |  |  |  | **10.500±0.141 mg/kg** |
| **STY13-JU** |  |  |  | **Average** |
|  | **#1’** | **#2’** | **#3’** |  |
|  | 0.023 | 0.024 | 0.024 | 0.024±0.001 |
|  | **#1''** | **#2''** | **#3''** |  |
|  | 0.022 | 0.023 | 0.023 | 0.022±0.001 |
|  | **#1'''** | **#2'''** | **#3'''** |  |
|  | 0.025 | 0.025 | 0.026 | 0.025±0.001 |
| **Total Average** |  |  |  | **0.024±0.001 mg/L** |
|  |  |  |  |  |
| **STY13-MU** |  |  |  | **Average** |
|  | **#1’** | **#2’** | **#3’** |  |
|  | 0.031 | 0.032 | 0.032 | 0.032±0.001 |
|  | **#1''** | **#2''** | **#3''** |  |
|  | 0.029 | 0.030 | 0.031 | 0.030±0.001 |
|  | **#1'''** | **#2'''** | **#3'''** |  |
|  | 0.034 | 0.032 | 0.035 | 0.034±0.005 |
| **Total Average** |  |  |  | **0.032±0.008 mg/L** |
| **STY13-AF/NOV** |  |  |  | **Average** |
|  | **#1’** | **#2’** | **#3’** |  |
|  | 1.18 | 1.23 | 1.26 | 1.22±0.04 |
|  | **#1''** | **#2''** | **#3''** |  |
|  | 1.09 | 1.04 | 1.11 | 1.08±0.04 |
|  | **#1'''** | **#2'''** | **#3'''** |  |
|  | 1.24 | 1.30 | 1.36 | 1.30±0.06 |
| **Total Average** |  |  |  | **1.20±0.11 mg/L** |
| **STY13-MF** |  |  |  | **Average** |
|  | **#1’** | **#2’** | **#3’** |  |
|  | 0.85 | 0.90 | 0.98 | 0.91±0.07 |
|  | **#1''** | **#2''** | **#3''** |  |
|  | 1.02 | 0.94 | 1.07 | 1.07±0.07 |
|  | **#1'''** | **#2'''** | **#3'''** |  |
|  | 1.14 | 1.01 | 1.09 | 1.08±0.07 |
| **Total Average** |  |  |  | **1.00±0.09 mg/L** |
|  |  |  |  |  |
| **SGTY13-AF** |  |  |  | **Average** |
|  | **#1’** | **#2’** | **#3’** |  |
|  | 0.65 | 0.66 | 0.67 | 0.66±0.02 |
|  | **#1''** | **#2''** | **#3''** |  |
|  | 0.64 | 0.65 | 0.65 | 0.65±0.01 |
|  | **#1'''** | **#2'''** | **#3'''** |  |
|  | 0.68 | 0.69 | 0.70 | 0.69±0.01 |
| **Total Average** |  |  |  | **0.67±0.02 mg/L** |
|  |  |  |  |  |
| **SGTY13-MF** |  |  |  | **Average** |
|  | **#1’** | **#2’** | **#3’** |  |
|  | 0.54 | 0.63 | 0.66 | 0.61±0.06 |
|  | **#1''** | **#2''** | **#3''** |  |
|  | 0.65 | 0.73 | 0.78 | 0.72±0.06 |
|  | **#1'''** | **#2'''** | **#3'''** |  |
|  | 0.75 | 0.77 | 0.81 | 0.78±0.03 |
| **Total Average** |  |  |  | **0.70±0.09 mg/L** |
| **STY15** |  |  |  | **Average** |
|  | **#1’** | **#2’** | **#3’** |  |
|  | 1.12 | 1.14 | 1.23 | 1.17±0.06 |
|  | **#1''** | **#2''** | **#3''** |  |
|  | 1.26 | 1.22 | 1.30 | 1.26±0.04 |
|  | **#1'''** | **#2'''** | **#3'''** |  |
|  | 1.40 | 1.29 | 1.36 | 1.35±0.06 |
| **Total Average** |  |  |  | **1.26±0.09 mg/L** |
| **SCCY15** |  |  |  | **Average** |
|  | **#1’** | **#2’** | **#3’** |  |
|  | 1.209 | 1.216 | 1.221 | 1.215±0.006 |
|  | **#1''** | **#2''** | **#3''** |  |
|  | 1.286 | 1.280 | 1.293 | 1.286±0.007 |
|  | **#1'''** | **#2'''** | **#3'''** |  |
|  | 1.161 | 1.134 | 1.070 | 1.122±0.047 |
|  | **#1''''** | **#2'''''** | **#3'''''** |  |
|  | 1.110 | 1.002 | 1.160 | 1.091±0.081 |
| **Total Average** |  |  |  | **1.18±0.09 mg/L** |

**Table 3Sd**. Quercetin content in selected samples (expressed as mg/L). Values of the three determinations for each replicate and three replicates.

| **STY15** |  |  |  | **Average** |
| --- | --- | --- | --- | --- |
|  | **#1’** | **#2’** | **#3’** |  |
|  | 16.90 | 15.70 | 14.90 | 15.8±1.0 |
|  | **#1''** | **#2''** | **#3''** |  |
|  | 17.10 | 18.20 | 19.40 | 18.2±1.2 |
|  | **#1'''** | **#2'''** | **#3'''** |  |
|  | 19.10 | 20.40 | 21.10 | 20.2±1.0 |
| **Total Average** |  |  |  | **18.0±2.2 mg/L** |
| **SCCY15** |  |  |  | **Average** |
|  | **#1’** | **#2’** | **#3’** |  |
|  | 18.30 | 18.80 | 20.40 | 19.2±1.1 |
|  | **#1''** | **#2''** | **#3''** |  |
|  | 20.70 | 19.60 | 22.30 | 20.9±1.4 |
|  | **#1'''** | **#2'''** | **#3'''** |  |
|  | 22.10 | 23.50 | 24.40 | 23.3±1.2 |
| **Total Average** |  |  |  | **21.1±2.1 mg/L** |

**Table 3Se**. Quercetin glucoside content in selected samples (expressed as mg/L). Values of the three determinations for each replicate and three replicates.

| **STY15** |  |  |  | **Average** |
| --- | --- | --- | --- | --- |
|  | **#1’** | **#2’** | **#3’** |  |
|  | 1.71 | 1.82 | 1.90 | 1.81±0.10 |
|  | **#1''** | **#2''** | **#3''** |  |
|  | 1.97 | 2.08 | 2.30 | 2.12±0.17 |
|  | **#1'''** | **#2'''** | **#3'''** |  |
|  | 2.07 | 2.17 | 2.31 | 2.18±0.12 |
| **Total Average** |  |  |  | **2.04±0.20 mg/L** |
| **SCCY15** |  |  |  | **Average** |
|  | **#1’** | **#2’** | **#3’** |  |
|  | 2.61 | 2.78 | 2.88 | 2.76±0.14 |
|  | **#1''** | **#2''** | **#3''** |  |
|  | 2.88 | 3.04 | 3.22 | 3.05±0.17 |
|  | **#1'''** | **#2'''** | **#3'''** |  |
|  | 3.04 | 3.28 | 3.35 | 3.23±0.16 |
| **Total Average** |  |  |  | **3.01±0.23 mg/L** |

**Table 3Sf**. Selected absorbances values in selected samples. Values of the three replicates.

| **STY13-MU** | **#1** | **#2** | **#3** | **Total Average** |
| --- | --- | --- | --- | --- |
| Abs620 | 0.458 | 0.475 | 0.475 | 0.469±0.010 |
| Abs520 | 1.620 | 1.680 | 1.800 | 1.700±0.092 |
| Abs420 | 1.690 | 1.820 | 1.800 | 1.800±0.101 |
| **STY13-AF/NOV** |  |  |  | **Total Average** |
| Abs620 | 1.150 | 1.260 | 1.340 | 1.250±0.095 |
| Abs520 | 5.300 | 5.450 | 5.400 | 5.383±0.076 |
| Abs420 | 3.9080 | 4.350 | 4.170 | 4.167±0.185 |
| **STY13-MF** |  |  |  | **Total Average** |
| Abs620 | 1.120 | 1.150 | 1.168 | 1.146±0.024 |
| Abs520 | 4.800 | 5.650 | 6.050 | 5.500±0.638 |
| Abs420 | 4.200 | 5.150 | 5.057 | 5.057±0.814 |
| **SGTY13-AF** |  |  |  | **Total Average** |
| Abs620 | 0.890 | 0.950 | 0.930 | 0.923±0.031 |
| Abs520 | 3.980 | 4.150 | 4.250 | 4.127±0.137 |
| Abs420 | 4.330 | 4.200 | 4.070 | 4.200±0.130 |
| **SGTY13-MF** |  |  |  | **Total Average** |
| Abs620 | 1.108 | 1.123 | 1.145 | 1.125±0.019 |
| Abs520 | 4.550 | 5.150 | 5.700 | 5.133±0.575 |
| Abs420 | 3.760 | 4.250 | 4.850 | 4.287±0.546 |
| **STY15** |  |  |  | **Total Average** |
| Abs620 | 0.820 | 0.767 | 0.821 | 0.803±0.031 |
| Abs520 | 3.690 | 3.810 | 3.897 | 3.799±0.104 |
| Abs420 | 3.704 | 3.590 | 3.493 | 3.596±0.106 |
| **SCCY15** |  |  |  | **Total Average** |
| Abs620 | 0.690 | 0.610 | 0.740 | 0.680±0.066 |
| Abs520 | 3.590 | 3.420 | 3.180 | 3.397±0.206 |
| Abs420 | 2.830 | 3.220 | 3.040 | 3.030±0.195 |

**Table 3Sg**. Wine shade and color index values in selected samples. Values of the three determinations for each replicate and three replicates.

| **STY13-MU** | **#1** | **#2** | **#3** | **Total Average** |
| --- | --- | --- | --- | --- |
| HUE=Abs420/Abs520 | 1.043 | 1.083 | 1.050 | 1.059±0.021 |
| CI=Abs420+Abs520+Abs620 | 3.768 | 3.975 | 4.165 | 3.969±0.199 |
| **STY13-AF/NOV** |  |  |  | **Total Average** |
| HUE | 0.751 | 0.798 | 0.772 | 0.774±0.024 |
| CI | 10.430 | 10.060 | 10.910 | 10.80±0.329 |
| **STY13-MF** |  |  |  | **Total Average** |
| HUE | 0.875 | 0.912 | 0.962 | 0.916±0.044 |
| CI | 10.120 | 11.950 | 13.038 | 11.703±1.475 |
| **SGTY13-AF** |  |  |  | **Total Average** |
| HUE | 1.088 | 1.012 | 0.958 | 1.019±0.065 |
| CI | 9.200 | 9.300 | 9.250 | 9.250±0.050 |
| **SGTY13-MF** |  |  |  | **Total Average** |
| HUE | 0.826 | 0.825 | 0.851 | 0.834±0.0145 |
| CI | 9.418 | 10.523 | 11.695 | 10.545±1.139 |
| **STY15** |  |  |  | **Total Average** |
| HUE | 1.004 | 0.942 | 0.896 | 0.947±0.054 |
| CI | 8.214 | 8.167 | 8.211 | 8.197±0.026 |
| **SCCY15** |  |  |  | **Total Average** |
| HUE | 0.788 | 0.942 | 0.956 | 0.895±0.093 |
| CI | 7.110 | 7.250 | 6.960 | 7.107±0.145 |

**Table 4S**. *trans*-resveratrol content (RES, expressed as mg/L) in refined and bottled wines (harvesting 2015), from samples treated with excess copper(II) and/or yeasts derivatives, and incubated (60 d, 20±1°C, dark, hermetically sealed, see text for details). The values are from three replicates.

|  | **#1** | **#2** | **#3** | **Total Average** |
| --- | --- | --- | --- | --- |
| SCCY15 + Cu(II) | 1.300 | 1.138 | 1.291 | 1.24±0.09 |
| SCCY15 + BB | 1.161 | 1.106 | 1.216 | 1.16±0.05 |
| SCCY15 + Cu(II) + BB | 1.15 | 1.028 | 1.235 | 1.120±0.08 |
| SCCY15 + EGSH | 1.337 | 1.131 | 1.259 | 1.24±0.10 |
| SCCY15 + Cu(II) + EGSH | 1.144 | 1.146 | 1.079 | 1.12±0.04 |
| SCCY15 + Cu(II) + BB + EGSH + TAN | 1.198 | 1.176 | 1.278 | 1.22±0.05 |

**Table 5S**. Quercetin (QUE, mg/L), quercetin glucoside (QUEG, mg/L) and total polyphenols (TPP, mgGAA/L) contents in SCCY15 refined and bottled wine samples, and corresponding samples treated with excess copper(II) and/or yeasts derivatives, and incubated (60 d, 20±1°C, dark, hermetically sealed, see text for details). Values of the three determinations for each replicate and three replicates.

| **QUE** |  |  |  | **Average** |
| --- | --- | --- | --- | --- |
| **SCCY15** | **#1’** | **#2’** | **#3’** |  |
|  | 19.0 | 20.3 | 21.2 | 20.1±1.1 |
|  | **#1’’** | **#2’’** | **#3’’** |  |
|  | 20.9 | 19.8 | 22.0 | 20.9±1.1 |
|  | **#1’’’** | **#2’’’** | **#3’’’** |  |
|  | 20.9 | 22.4 | 23.4 | 22.2±1.3 |
| **Total Average** |  |  |  | **21.1±1.0 mg/L** |
| **SCCY15** + Cu(II) | **#1’** | **#2’** | **#3’** |  |
|  | 17.1 | 18.8 | 21.2 | 19.0±2.1 |
|  | **#1’’** | **#2’’** | **#3’’** |  |
|  | 19.8 | 21.0 | 22.8 | 21.2±1.5 |
|  | **#1’’’** | **#2’’’** | **#3’’’** |  |
|  | 21.1 | 22.9 | 25.6 | 23.2±2.3 |
| **Total Average** |  |  |  | **21.1±2.1 mg/L** |
| **SCCY15** + Cu(II) + BB | **#1’** | **#2’** | **#3’** |  |
|  | 14.9 | 17.1 | 19.1 | 17.0±2.1 |
|  | **#1’’** | **#2’’** | **#3’’** |  |
|  | 17.2 | 19.2 | 21.1 | 19.1±2.0 |
|  | **#1’’’** | **#2’’’** | **#3’’’** |  |
|  | 18.9 | 21.0 | 23.4 | 21.1±2.2 |
| **Total Average** |  |  |  | **19.1±2.0 mg/L** |
| **QUEG** |  |  |  | **Average** |
| **SCCY15** | **#1’** | **#2’** | **#3’** |  |
|  | 2.85 | 3.01 | 3.26 | 2.85±0.25 |
|  | **#1’’** | **#2’’** | **#3’’** |  |
|  | 2.93 | 2.75 | 3.36 | 3.01±0.31 |
|  | **#1’’’** | **#2’’’** | **#3’’’** |  |
|  | 3.05 | 3.32 | 3.41 | 3.26±0.19 |
| **Total Average** |  |  |  | **3.04±0.21 mg/L** |
| **SCCY15** + Cu(II) | **#1’** | **#2’** | **#3’** |  |
|  | 1.55 | 1.82 | 2.02 | 1.80±0.24 |
|  | **#1’’** | **#2’’** | **#3’’** |  |
|  | 1.76 | 2.10 | 2.15 | 2.00±0.21 |
|  | **#1’’’** | **#2’’’** | **#3’’’** |  |
|  | 2.02 | 2.29 | 2.47 | 2.26±0.23 |
| **Total Average** |  |  |  | **2.02±0.23 mg/L** |
| **SCCY15** + Cu(II) + BB | **#1’** | **#2’** | **#3’** |  |
|  | 1.62 | 1.85 | 2.01 | 1.83±0.19 |
|  | **#1’’** | **#2’’** | **#3’’** |  |
|  | 1.82 | 2.02 | 2.31 | 2.05±0.25 |
|  | **#1’’’** | **#2’’’** | **#3’’’** |  |
|  | 2.01 | 2.20 | 2.45 | 2.22±0.22 |
| **Total Average** |  |  |  | **2.03±0.20 mg/L** |
| **TPP** |  |  |  | **Average** |
| **SCCY15** | **#1’** | **#2’** | **#3’** |  |
|  | 2749 | 2613 | 2866 | 2743±127 |
|  | **#1’’** | **#2’’** | **#3’’** |  |
|  | 2674 | 2795 | 2878 | 2782±103 |
|  | **#1’’’** | **#2’’’** | **#3’’’** |  |
|  | 2789 | 2812 | 2899 | 2833±58 |
| **Total Average** |  |  |  | 2786±95 **mg(GAA)/L** |
| **SCCY15** + Cu(II) | **#1’** | **#2’** | **#3’** |  |
|  | 2501 | 2630 | 2763 | 2632±131 |
|  | **#1’’** | **#2’’** | **#3’’** |  |
|  | 2621 | 2765 | 2896 | 2761±138 |
|  | **#1’’’** | **#2’’’** | **#3’’’** |  |
|  | 2758 | 2902 | 3018 | 2893±130 |
| **Total Average** |  |  |  | **2762±131 mg(GAA)/L** |

**GRAPHICAL ABSTRACT**
